# Supplementary material for: Preparation of photonic molecular trains via soft-crystal polymerization of lanthanide complexes
Source: PubMed Central journal article supplement (PMC9256636; doi:10.1038/s41467-022-31164-z), 2022-07-05
Supplement: 41467_2022_31164_MOESM3_ESM.pdf [file 41467_2022_31164_MOESM3_ESM.pdf]

### **Description of Additional Supplementary files**

File name: Supplementary Movie 1

Description: Connection of Tb(III) crystal and Dy (III) crystal via pyridine vaporisation.
